# Supplementary material for: Forced Diuresis with Matched Isotonic Intravenous Hydration Prevents Renal Contrast Media Accumulation
Source: MDPI journal article supplement (doi:10.3390/jcm11030885), 2022-02-08
Supplement: s1 [file s1]

## Supplementary material

### Supplementary Table S1

Multivariable analysis of mean contrast accumulation score as a function of various parameters

|                                   | OR [95% CI]                 | p-value |
|-----------------------------------|-----------------------------|---------|
| RenalGuard                        | 1 (reference)               | NA      |
| Control (normal RF)               | 843.76 [15.86 to 278229.59] | 0.005   |
| Control (impaired RF)             | 126.99 [3.9 to 12782.82]    | 0.014   |
| Procedure time (mins)             | 1.1 [1.04 to 1.2]           | 0.006   |
| eGFR (ml/min/1.73m <sup>2</sup> ) | 1.04 [0.97 to 1.11]         | 0.27    |
| Procedure - PCI                   | 2.82 [0.21 to 43.28]        | 0.44    |
| Procedure - TAVR                  | 2.05 [0.04 to 138.74]       | 0.72    |
| Total contrast media (ml)         | 0.98 [0.94 to 1.01]         | 0.18    |
| Female gender                     | 0.99 [0.11 to 8.03]         | 1       |
| Patient age (years)               | 0.93 [0.82 to 1.06]         | 0.28    |
| Diabetes mellitus                 | 0.69 [0.06 to 9.19]         | 0.77    |
| Hypertension                      | 0.6 [0.02 to 21.92]         | 0.77    |

RF – renal function, eGFR – estimated glomerular filtration rate, PCI - percutaneous coronary intervention, TAVR - transcatheter aortic valve replacement.

Multivariable analysis showed that RenalGuard treatment and procedure duration were the only factors independently associated with a lower CAS (OR 843.76, 95% CI 15.86 to 278229.59 p=0.005 for RenalGuard vs. normal renal function without RenalGuard, and OR 126.99, 95% CI 3.9 to 12782.82, p=0.014 for RenalGuard vs. impaired renal function without RenalGuard; OR 1.1, 95% CI 1.04 to 1.2, p=0.06 for procedure time). All variables were tested for interaction with treatment group by separate models with each specific interaction term. No interaction was found to be statistically significant (p>0.05), thus, all interaction terms were removed from the final model to enhance model predictability.
